# Supplementary material for: Water-use dynamics of an alien invaded riparian forest within the mediterannean climate zone of the Western Cape, South Africa
Source: Copernicus journal article supplement (doi:10.5194/hess-2016-650), 2017-01-16
Supplement: Supplementary file [file hess-2016-650-AC1-supplement.pdf]

# Water-use dynamics of an alien invaded riparian forest within the mediterranean climate zone of the Western Cape, South Africa

Scott-Shaw Bruce C<sup>1</sup>, Everson Colin S<sup>1,2,3</sup> and Clulow Alistair D<sup>4</sup>

<sup>1</sup>Center for Water Resources Research, School of Agriculture, Earth and Environmental Sciences, University of KwaZulu-Natal, Private Bag X01, Scottsville, Pietermaritzburg 3209, South Africa.

<sup>2</sup>South African Environmental Observation Network (SAEON), Grasslands-Wetlands-Forests Node, 1 Peter Brown Drive, Queen Elizabeth Park, Montrose, Pietermaritzburg 3201, South Africa

<sup>3</sup>Department of Plant and Soil Sciences, University of Pretoria, Private Bag X20, Hatfield, Pretoria 0028, South Africa.

<sup>4</sup>Agrometeorology, School of Agriculture, Earth and Environmental Sciences, University of KwaZulu-Natal, Private Bag X01, Scottsville, Pietermaritzburg 3209, South Africa.

## Abstract

In South Africa the invasion of riparian forests by alien trees has the potential to affect the country's limited water resources. Tree water-use measurements have therefore become an important component of recent hydrological studies. It is difficult for government initiatives, such as the Working for Water (WfW) alien clearing programmes, to justify alien tree removal and implement rehabilitation unless a known hydrological benefit can be seen. Consequently water-use within a riparian forest along the Buffeljags river in the Western Cape of South Africa was monitored over a three year period. The site consisted of an indigenous stand of Western Cape afrotemperate forest adjacent to a large stand of introduced *Acacia mearnsii*. The heat ratio method of the heat pulse velocity sap flow technique, was used to measure the sap flow of a selection of representative indigenous species in the indigenous stand, a selection of *A. mearnsii* trees in the alien stand and two clusters of indigenous species within the alien stand. The indigenous trees in the alien stand at Buffeljags river showed significant intraspecific differences in the daily sap flow rates varying from 15 to 32 L·day<sup>-1</sup> in summer (sap flow being directly proportional to tree size). In winter (June) this was reduced to only 7 L·day<sup>-1</sup> when less energy was available to drive the transpiration process. The water-use in the *A. mearnsii* trees showed peaks in transpiration during the months of March 2012, September 2012 and February 2013. These periods corresponded to favourable climatic conditions of high average temperatures, rainfall and high daily vapour pressure deficits (VPD - average of 1.26 kPa). The average daily sap flow ranged from 25 L to 35 L in summer and approximately 10 L in the winter. The combined accumulated daily sap flow per year for the three *Vepris lanceolata* and three *A. mearnsii* trees was 5 700 and 9 200 L respectively, clearly demonstrating the higher water-use of the introduced *Acacia* trees during the winter months. After spatially upscaling the findings, it was concluded that, annually, the alien stand used nearly six times more water per unit area than the indigenous stand (585 mm·yr<sup>-1</sup> compared to 101 mm·yr<sup>-1</sup>). This finding indicates that there would be a gain in streamflow if the alien species are removed from riparian forests and rehabilitated back to their natural state.

**Key Words:** Sap flow, transpiration, indigenous trees, introduced trees, upscaling

## 1   **1   Introduction**

2  
3   While extensive research has been undertaken on the water-use of terrestrial ecosystems in South  
4   Africa, little is known about riparian tree water-use and growth of both indigenous and introduced tree  
5   species. This knowledge gap, as well as the poor ecological condition of South African riparian habitats,  
6   has led to uncertainty and contention over riparian rehabilitation techniques. The deep fertile soils, with  
7   high soil moisture contents associated with riparian areas, make them ideal for plant establishment and  
8   growth (Everson *et al.*, 2007). As such, these areas are extremely vulnerable to invasion by pioneer  
9   plant species, particularly alien species that have historically been introduced for commercial forestry.  
10   It is widely believed that riparian zone vegetation, which can be described as the interface between  
11   terrestrial and aquatic ecosystems (Richardson *et al.*, 2007), has a significant impact on the hydrology  
12   of a catchment due to the close proximity of riparian vegetation rooting systems to the water table. Most  
13   riparian trees are phreatophytic, meaning they have access to a permanent source of water because their  
14   rooting system is within the shallow ground water.

15  
16   Through the process of evaporation and transpiration, riparian vegetation influences streamflow rates,  
17   ground water levels and local climates (Richardson *et al.*, 2007). Vegetation along riverbanks filter  
18   surface and subsurface water moving across and through the soil to the river channel. This helps to  
19   maintain channel water quality, by regulating the water temperature (through shading), bank stability  
20   and turbidity and traps debris (Askey-Dorin *et al.* 1999). Riparian vegetation can access a wide range  
21   of water sources within the riparian zone, which includes rainfall, soil water, stream water and  
22   groundwater (O’Grady *et al.*, 2005). Commercial forestry has been blamed for increasing the green  
23   water (water lost by total evaporation) and decreasing the blue water (water in rivers and dams) in areas  
24   across South Africa (Jewitt, 2006). Introduced tree species can change the natural landscape by  
25   destabilizing catchments and thereby increasing soil erosion, altering fire regimes and hydrology, as  
26   well as changing the physical and chemical composition of the soil (Joshi *et al.* 2004; Le Maitre *et al.*  
27   1996; Tabacchi *et al.* 2000). For these reasons, invasive alien plants, particularly introduced commercial  
28   trees, are considered to be a major threat to biodiversity globally (Reid *et al.* 2009; Solarz 2007; Wal *et*  
29   *al.* 2008). There is a widespread belief in South Africa and globally that indigenous tree species, in  
30   contrast to the introduced trees, are water efficient and should be planted more widely in land restoration  
31   programmes. This is based on observations that indigenous trees are generally slow growing, and that  
32   growth and water-use are broadly linked (Everson *et al.*, 2008; Gush, 2011). However, tree water-use  
33   is technically difficult and expensive to measure, and so there is scant evidence of low water-use by  
34   indigenous trees in South Africa. A global review of water-use differences between introduced invasive  
35   and indigenous (native) plants at the leaf, plant and ecosystem scale (Cavaleri and Sack, 2010), indicates  
36   that invasive plants use up to 136 % more water than the indigenous species at the leaf scale (Baruch  
37   and Fernandez, 1993; Dixon *et al.*, 2004; Pratt and Black, 2006). At the plant scale there is a diverse  
38   range in water-use ranging from the invasive species using 100 % less to 150 – 300 % more water than  
39   the indigenous species (Cleverly *et al.*, 1997; Nagler *et al.*, 2003; Kagawa *et al.*, 2009). At the ecosystem  
40   scale studies indicate that invasive species use 189 % more water than indigenous dominated areas,  
41   particularly in tropical moist forests (Nosetto *et al.*, 2005; Yopez *et al.*, 2005; Fritzsche *et al.*, 2006). In  
42   the high rainfall areas of South Africa, invasive alien plants growing in riparian areas are estimated to  
43   reduce annual streamflow by  $523 \times 10^6 \text{ m}^3$  with a predicted annual reduction estimated to be as high as  
44    $1\,314 \times 10^6 \text{ m}^3$  if allowed to reach a future fully invaded state (Cullis *et al.*, 2007). Management of  
45   invaded riparian zones can result in hydrological gains disproportionately greater than the catchment  
46   area affected, with up to three times more streamflow yield than upslope areas (Scott and Lesch, 1996;  
47   Scott, 1999).

1 For many field and modelling applications, accurate estimates of total evaporation (ET) are required,  
2 but are often lacking. Modelled estimates are often used without proper validation, and the verification  
3 of the results is questionable, especially in dynamic and highly-sensitive riparian areas. With the on-  
4 going development of micrometeorological techniques, it is possible to accurately quantify the various  
5 components of the water cycle over various terrestrial surfaces. The use of micrometeorological  
6 techniques is largely dependent on location, time constraints and available funds. However, due to  
7 continuous research by experts, the implementation of these techniques has become faster and more  
8 easily understood. In addition, comparisons between techniques and up-scaling have become possible,  
9 allowing for greater freedom in the choice of techniques and the length of measurement (Savage *et al.*,  
10 2004; Jarman *et al.*, 2008). Sap-flux density studies have been undertaken locally and internationally,  
11 and are well documented. Sap flux density measurements give precise information on flow directions  
12 as well as spatial and temporal flow distribution (Vandegehuchte and Steppe, 2013). The heat pulse  
13 velocity (HPV) method is the most accurate of the available methods when compared against  
14 gravimetric methods (Steppe *et al.*, 2010; Vandegehuchte and Steppe, 2013).

15  
16 The Buffeljags River site in the Western Cape has been an ecological research site since 2006 and forms  
17 part of a selective thinning experiment designed to assist Working for Water (WfW) clearing  
18 programmes. The government-funded WfW programme clears catchment areas of invasive alien plants  
19 with the aim of restoring hydrological functioning while also providing poverty relief to local  
20 communities (Turpie *et al.*, 2008). The aim of this study was to measure tree water-use to quantify the  
21 potential hydrological benefit of these forest management practices, improve the realistic modelling of  
22 these management approaches and provide guidelines towards suitable indigenous alternatives.

## 23 24 **1.1 The study area**

25  
26 The Buffeljags river flows southwards along the Langeberg West mountain range into the Buffeljags  
27 dam. The Buffeljags river study area is at latitude 34°00'15"S and longitude 20°33'58"E (Figure 1),  
28 approximately 95-110 m above mean sea level. The research area is within Quaternary Catchment (QC)  
29 H70E and falls under the Western Cape Afrotemperate forest type which is characterized by very small  
30 forest patches occurring along boulder screes consisting of streams, gorges and mountain slopes  
31 (Geldenhuys, 2010). The surrounding vegetation type is south Langeberg sandstone fynbos (Mucina  
32 and Rutherford, 2011). The Langeberg Mountains consist of Table Mountain Sandstone/quartzite (north  
33 of the Buffeljags River) with a ridge of shales to the south of the river. The soils are characterised by  
34 structureless sands, a result of previous alluvial deposition. The climate is typical of the Western Cape  
35 with hot summers and cold winters. However, the rainfall is fairly evenly spread throughout the year.  
36 The long-term (137 year record) mean annual precipitation (MAP) at Buffeljags River is 636 mm. The  
37 daily maximum temperatures range from 17.1 °C in July to 27.5 °C in January. The mean daily  
38 minimum temperature is 15 °C in February and 5 °C in July. A 99 ha riparian forest occurs along the  
39 river with 75 ha of invaded forest (lower reach) and 24 ha of pristine indigenous forest (upper reach)  
40 (Figure 1), comprising of species such as *Celtis africana*, *V. lanceolata*, *Prunus africana*, *Rapanea*  
41 *melanophloeos* and *Afrocarpus (Podocarpus falcatus)*. The stand height ranged from 3 to 15 m in the  
42 indigenous stand and 11 to 17 m in the alien stand. The surrounding vegetation is mountainous fynbos  
43 and renosterveld.

44  
45 Historically *A. mearnsii* trees were planted for small scale uses (firewood and building material) on the  
46 nearby farms. Working for Water cleared most of the alien trees which have since grown back over the  
47 last 15 years. Currently the invasion extends approximately one kilometer along the river.

## 1.2 The study sites

Three representative trees within the indigenous stand were instrumented for monitoring sapflow. These trees included an understory tree (*Rothmania capensis*), one medium (*V. lanceolata*) and one large evergreen tree (*V. lanceolata*) that were most common throughout the stand. The leaf area index (LAI) within this stand was 3.6 throughout most of the season with a slight reduction during the winter months. Downstream of this site, within the alien stand (Figure 1), three *A. mearnsii* trees were instrumented over the three year study period. In a similar way, small, medium and large diameter classes were chosen to assist in the up-scaling of single tree transpiration measurements of the *Acacia* trees. The LAI of the *Acacia* stand was 3.1 during the summer months and 2.8 during the winter months. Two indigenous tree clusters within the alien stand were also instrumented. The *V. lanceolata* cluster contained two medium and one large diameter class trees (LAI of 3.4) while the *C. africana* cluster contained two large diameter class trees with a LAI of 3.3 in the summer months and 1.8 during the winter months. The LAI provided an indication of the seasonality of the trees and the light variations between the sites.

Both the indigenous and introduced alien stands were in a climax state with most of the canopy trees falling into the medium or large size classes. Although there were many smaller trees (excluding trees with a  $\varnothing < 5$  mm), these did not contribute significantly to the total transpiration as they were shaded out by the climax trees. An overview of the individual tree characteristics has been provided in Table 1. Variations in moisture content were possibly due to the different ages and sizes of the trees measured (variations in sap wood depth and active xylem concentration).

## 2 Methods

A meteorological station was established on the 25<sup>th</sup> of January 2012 at Buffeljags River in a nearby planted *Eragrotis plana* field, 1.6 km from the indigenous site. Rainfall (TE525, Texas Electronics Inc., Dallas, Texas, USA), at a height of 1.2 m from the ground was measured with additional measurements at a height of 2 m for air temperature and relative humidity (HMP45C, Vaisala Inc., Helsinki, Finland), solar irradiance (LI-200, LI-COR, Lincoln, Nebraska, USA), net radiation (NR-Lite, Kipp and Zonen, Delft, The Netherlands) windspeed and direction (Model 03002, R.M. Young, Traverse city, Michigan, USA). These were measured at a 10 second interval and the appropriate statistical outputs were recorded every hour.

A Heat Pulse Velocity (HPV) system using the heat ratio algorithm (Burgess, 2001) was set up to monitor long-term sapflow on all of the selected trees over a three year period. The instrumentation is described by Clulow *et al.* (2013) and included a 0.5 second heat source (sapflow trace) in the form of a line heater. A pair of type T-thermocouple probes was used to measure pre- and post-temperatures 5 mm above (downstream) and below (upstream) of the heater probe (Clulow *et al.*, 2013). Hourly measurements (CR1000, Campbell Scientific Inc., Logan, Utah, USA) were captured over the three year monitoring period (January 2012 to March 2015). Monthly checks were undertaken to adjust probe depths in order to account for radial stem growth if required.

An assessment of the bark and sapwood depth was undertaken on the selected trees using an increment borer. This assessment assisted in determining the HPV probe insertion depths and the calculation of sapwood area. The heat pulse velocity ( $V_h$ ) was calculated from:

$$V_h = \frac{k}{x} \ln\left(\frac{V_1}{V_2}\right) 3600 \quad (1)$$

1  
2 where,  $k$  is the thermal diffusivity of green (fresh) wood,  $x$  is the distance (5 mm) above and below the  
3 heater (representing upstream and downstream), and  $v_1$  and  $v_2$  are increases in the downstream and  
4 upstream temperatures (from initial average temperatures) respectively. A thermal diffusivity ( $k$ ) of  $2.5$   
5  $\times 10^{-3} \text{ cm}^2 \cdot \text{s}^{-1}$  (Marshall 1958) was used. Wounding or damaged xylem (non-functional) around the  
6 thermocouples was accounted for using wound correction coefficients described by Swanson and  
7 Whitfield (1981). Sap velocities were then calculated by accounting for wood density and sapwood  
8 moisture content as described by Marshall (1958). Finally, sap velocities were converted to tree water-  
9 use ( $Q_{\text{tree}}$ ) or sap flow ( $\text{L} \cdot \text{hr}^{-1}$ ) by calculating the sum of the products of sap velocity and cross-sectional  
10 area for individual symmetrical tree stems (Clulow *et al.*, 2013).

11  
12 Tree growth was recorded every two months throughout the monitoring period by measuring diameter  
13 at breast height with a dendrometer, and canopy height using a VL402 hypsometer (Haglöf, Sweden).  
14 Leaf area index (LAI-2200, LI-COR, Lincoln, Nebraska, USA) was measured monthly under each  
15 stand. Riparian forests typically have a narrow canopy with limited aerodynamic fetch, which excludes  
16 techniques such as eddy covariance and scintillometry being used to support the up-scaling of point  
17 water-use measurements to stand water-use values. Due the homogenous composition of the alien stand  
18 and the dominance of *Vepris* and *Celtis* species within the indigenous stand, a methodology was  
19 followed based on recent up-scaling studies (Ford *et al.*, 2007; Miller *et al.*, 2007). In addition, detailed  
20 stem density data were available for the site due to extensive ongoing ecological research (Atsame-  
21 Edda, 2014). Medoid (representative of the population) trees were selected for sap flow measurement.  
22 This included the most commonly occurring alien and indigenous species (canopy and understorey) and  
23 a range of size classes for each species. A species density analysis was undertaken ( $\text{Ø} > 50 \text{ mm}$ ) in  
24 replicated  $400 \text{ m}^2$  plots per site. A relationship between total tree water-use ( $Q_{\text{tree}} - \text{L} \cdot \text{day}^{-1}$ ) and each  
25 representative size and species class was identified. This allowed for the estimation of the stand water  
26 flux ( $Q_{\text{stand}}$ ) which was divided by the plot area ( $400 \text{ m}^2$ ) in order to obtain comparative units between  
27 the indigenous and alien stands ( $\text{L} \cdot \text{day}^{-1} \cdot \text{ha}^{-1}$ ). These values were then accumulated to annual values so  
28 that the effect of alien and indigenous (evergreen and deciduous) stands on the water balance could be  
29 quantified throughout a hydrological year.

30  
31 The *A. mearnsii* site had a thin litter layer consisting mostly of broken branches, bark and leaves  
32 compared with the indigenous site which had a thicker litter layer with a large amount of organic matter  
33 accumulated from the various tree species and understorey vegetation. Volumetric soil water contents  
34 were measured hourly at both the indigenous and alien sites (concurrent to the HPV measurements)  
35 with three time domain reflectometry (TDR) probes (Campbell Scientific. CS 615) installed  
36 horizontally at each site at depths of 0.1 m, 0.3 m and 0.5 m. The TDR probes were connected to spare  
37 channels on the CR1000 datalogger of the HPV system. With hourly volumetric water content  
38 measurements, the response of trees to rainfall events, or stressed conditions, were monitored and  
39 supported the interpretation of the HPV measurements. An observation borehole was installed at the  
40 site to monitor the groundwater recharge as well as to confirm the assumption that all the trees within  
41 the riparian forest had direct access to groundwater. Soil samples were taken to determine the  
42 distribution of roots, bulk density and soil water content. These samples (taken at various depths  
43 throughout the profile) were weighed before and after oven drying to determine the soil characteristics.  
44  
45

### 46 **3 Results**

#### 47 **3.1 Weather conditions during the study period**

1  
2 The MAP over the three year study was significantly higher than the long-term average (636 mm) by  
3 300-500 mm (2012 to 2014 being 1017, 902 and 1127 mm respectively). The rainfall distribution was  
4 variable (lacking a seasonal trend) throughout the three years with a mean monthly value of 85 mm  
5 (Figure 2). There were numerous days of high hourly rainfall (to a maximum of 30mm·h<sup>-1</sup> and 102  
6 mm·day<sup>-1</sup>) demonstrating the prevalence of high intensity storms at the site (Figure 3). The solar  
7 radiation peaked at 34 MJ·m<sup>-2</sup>·day<sup>-1</sup> following the same seasonal trend to that of the daily minimum and  
8 maximum temperatures.

9  
10 The relative humidity (RH) ranged from 20 % to 90 %, with little seasonal trend. During periods of  
11 high solar radiation, the atmospheric demand was high and correlated to peaks in transpiration rates.  
12 An average daily temperature of 22.1 °C was recorded at Buffeljags River in the summer months.  
13 During these months, daily maximum temperatures occasionally exceeded 40 °C. During the winter  
14 months, the temperatures averaged 12.1 °C due to numerous days with low solar radiation, such as  
15 during rainfall events and cloudy days, and would likely result in little to no transpiration occurring.  
16 The daily reference total evaporation (ET<sub>o</sub>), derived from data captured at the meteorological station,  
17 averaged approximately 1 mm in the winter period to 4 mm during summer. The daily ET<sub>o</sub> peaked at  
18 7.5 mm, which correlated to peaks in measured transpiration.

### 19 20 **3.2 Tree water-use**

21  
22 For comparative purposes the water-use of similar sized *Vepris* and *Acacia* trees were compared during  
23 the wet and the dry seasons (Figures 4 and 5). During the summer month of January, the *V. lanceolata*  
24 tree water-use exhibited seasonal curves indicative of the clear sunny days and high correlation to the  
25 solar radiation. The medium sized *V. lanceolata* (Ø 17.4 cm) used an average of 24 L·day<sup>-1</sup> during the  
26 summer months and an average of 8 L·day<sup>-1</sup> during the winter months (Figure 4). The medium sized *A.*  
27 *mearnsii* (Ø 16.7 cm) used an average of 10 L·day<sup>-1</sup> in the winter months, similar to that of the *V.*  
28 *lanceolata*. In the summer months, the *A. mearnsii* used an average of 39 L·day<sup>-1</sup>, significantly higher  
29 than the indigenous tree (Figure 5). During significant rainfall periods (> 5 mm) there was little to no  
30 water-use in both trees due to the low evaporative demand and the wet canopy.

31  
32 Individual whole tree water-use was significantly reduced in winter (May and June) for most of the  
33 trees, dropping by approximately 75 %. This was attributed to fewer daylight hours in the winter months  
34 which resulted in less available energy at this time of year to drive the transpiration process. From  
35 November 2012 to March in 2013, all species showed a significant increase in water-use during this hot  
36 summer period. The water-use in the *A. mearnsii* trees showed a distinct peak in transpiration during  
37 the months of March 2012, September 2012 and February 2013. During March 2012, the high average  
38 temperature (21.5 °C), a 76 mm rainfall event and high daily vapour pressure deficits (VPD) (average  
39 of 1.26 kPa) contributed to a high atmospheric demand. On cloudless days with a high VPD and high  
40 soil water, the trees would be expected to use more water. The average daily sap flow ranged from 15  
41 L·day<sup>-1</sup> in the smaller class tree, 25 L·day<sup>-1</sup> in the medium class tree and 39 L·day<sup>-1</sup> in the large class  
42 tree (Tables 1 and 2).

43  
44 The daily summer water-use of two of the *V. lanceolata* trees (Table 2) in the upper indigenous stand  
45 showed high water-use with an average of 19 L·day<sup>-1</sup> (medium class) and 37 L·day<sup>-1</sup> (large class). The  
46 high water-use in the large tree was ascribed to its size and deep rooting system which is presumed to  
47 have had easy access to ground water at this site due to the proximity to the river (10 m horizontal  
48 distance). This was verified with the borehole levels and a root analysis at the site. The water level

1 ranged from 3.2 m to 4.8 m at the site where roots were observed to 5 m, while installing the borehole.  
2 The water-use of the small understorey tree *R. capensis* had a much lower water-use (average of 8  
3 L·day<sup>-1</sup>) which indicated that although the understorey used less water, it still made a significant  
4 contribution to the water balance given the abundance of understorey species in the indigenous forest.  
5

6 The *C. africana* trees displayed a high water-use during the summer period. As this is a deciduous tree,  
7 no water was used during leaf fall in winter. The largest *C. africana* tree had a canopy area of 75 m<sup>2</sup>  
8 and was the largest tree at the site. Approximately 37 700 L of water was transpired by this tree annually  
9 during the measurement period (Table 2). Given that this species is deciduous, it is important to note  
10 that this tree uses a high volume of water in summer when water resources are usually limited. However,  
11 in a summer rainfall region, like eastern South Africa, this tree would not use water during the low flow  
12 season when water resources are limited. This is important for management decisions throughout  
13 rainfall zones in South Africa.  
14

15 The indigenous cluster in the alien site had a LAI of 3.4, which was higher than the LAI of 3.1 under  
16 the nearby *A. mearnsii* trees. The indigenous trees in the upper reach indigenous site had an LAI of 3.6.  
17 Although the summer water-use was higher in the introduced trees, the radial sapwood area was larger  
18 in the indigenous trees (up to 413 cm<sup>2</sup>) than the introduced trees (up to 171 cm<sup>2</sup>). Trees with the highest  
19 sap velocities are therefore not necessarily those with highest whole tree water-use. However, this does  
20 indicate that the alien trees are more effective users of water, relative to their sapwood area.  
21

### 22 **3.3 Soil profile and water content**

23  
24 The volumetric water content (VWC) in the alien stand at Buffeljags River was very low, dropping to  
25 7 % during dry periods (Figure 6). During high rainfall events the soil VWC exceeded 20%, showing a  
26 rapid but short response to rainfall. This indicates that the soil water moves through the soil profile  
27 rapidly with very little water being stored in the profiles, particularly in the lower profile. The soils had  
28 a dry bulk density ( $\rho_b$ ) of 1.58 g·cm<sup>-3</sup>, a particle density ( $\rho_{\text{particle}}$ ) of 2.66 g·cm<sup>-3</sup> and a porosity 0.42,  
29 typically characteristic of sandy soils. The drying curve, after an isolated event, took on average 22  
30 hours from saturation to the expected field capacity (Figure 4). *Acacia* stands are known to have deep  
31 rooting systems, with observations of greater than 8 m in South Africa (Everson *et al.*, 2006). This  
32 suggests that during dry periods, this stand can access water from deeper layers in the soil profile.  
33

34 In the indigenous stand (Figure 7), the middle TDR probe (0.3 m) showed the highest water content.  
35 During the warmest period (December to April) there was very little water in the profile (even after  
36 rainfall events). This would suggest that the deeper roots from the indigenous species were readily using  
37 water below the TDR probe measurement depths as there was no correlation between transpiration and  
38 change in VWC. In contrast, the alien stand upper soil profile water content responded to rainfall events  
39 suggesting that interception storage (including throughfall and stemflow that contribute to litter catch)  
40 played a significant role when comparing these stands. After an isolated rainfall event, the drying curve,  
41 of the soil profile at the indigenous site took much longer (up to one week) from its peak to the driest  
42 level. The average water content was 5 %, lower than the alien stand, suggesting a difference in root  
43 activity given the same soil characteristics.  
44

45 The VWC at both sites did not respond significantly to rainfall events under 5 mm unless during  
46 consecutive events. The average water table depth, measured using an observation borehole, ranged  
47 from 5.2 m below the ground surface during the dry season to 3.2 m below the ground surface during  
48 the wet season (excluding extreme events). The water table recharge time showed a strong relationship

1 to the soil wetting and drying response time recorded at both sites. In conclusion, both the indigenous  
2 and introduced stands are energy limited rather than water limited as both had root contact with the  
3 water table.

### 4 5 **3.4 Upscaling tree water-use**

6  
7 The results obtained from the research area were used to determine an actual annual water-use per unit  
8 area for both the invaded alien and pristine indigenous tree stands (Figure 8). Using the stem density per  
9 size class, stands of forest were compared rather than individual trees. A closed canopy was assumed.  
10 The upscaled water-use for a three year average of the *A. mearnsii* stand was 5 879 L·ha<sup>-1</sup> for the small  
11 size class, 7 639 L·ha<sup>-1</sup> for the medium size class and 9 981 L·ha<sup>-1</sup> for the large size class. When upscaled  
12 for all species and size classes for the three year average, the total stand water-use was approximately  
13 5.85 ML·ha<sup>-1</sup>·year<sup>-1</sup> (585 mm·yr<sup>-1</sup>). This was 57 % of the average annual precipitation recorded during  
14 the monitoring period (1021 mm).

15  
16 The annual water-use of the indigenous stand was 1 209 L·ha<sup>-1</sup> for the small size class, 6 321 L·ha<sup>-1</sup> for  
17 the medium size class and 18 900 L·ha<sup>-1</sup> for the large size class. The upscaled indigenous stand used  
18 1.01 ML·ha<sup>-1</sup>·year<sup>-1</sup> (101 mm·yr<sup>-1</sup>). Based on these results we concluded that the alien stand uses nearly  
19 six times more water per unit area annually than the indigenous stand. This roughly correlated to the  
20 growth rate of each stand, where the stem breast height diameter increase over the study period (recorded  
21 on each tree measured) was between three to eight times faster than similar sized indigenous trees.

22  
23 The inter-species and size class water-use variations, particularly within the indigenous stand, highlight  
24 the importance of good replications of a representative sample tree species and size classes. These  
25 results also highlight that individual indigenous trees, such as the *C. africana*, can use more water than  
26 an individual alien *A. mearnsii* tree. An example of this is the largest *Celtis* using 14 000 L more water  
27 annually than the largest *A. mearnsii*. However, the *C. africana* tree had a much larger diameter and  
28 had a large canopy area under which no other trees grew, whereas approximately ten medium sized *A.*  
29 *mearnsii* trees could occupy the same area as this particular tree. The importance of upscaling using  
30 representative samples of species and size classes is clearly demonstrated by the study.

## 31 32 **4 Discussion and Conclusion**

33  
34 There is a widespread belief in South Africa that indigenous tree species, in contrast to introduced tree  
35 species, use less water and should be planted more widely in land rehabilitation programmes (Olbrich  
36 et al., 1996; Dye et al., 2001; Everson et al., 2007; Dye et al., 2008; Gush and Dye, 2008; Gush and  
37 Dye, 2009; Gush and Dye, 2015). A review of relevant literature revealed a general paucity of  
38 information relevant to both indigenous and introduced tree water-use, the methods of replication and  
39 the techniques used. Internationally, improved HPV techniques have been used on various vegetation  
40 types and the accuracy of these studies has been validated using gravimetric methods (Granier and  
41 Loustau, 2001; Burgess *et al.*, 2001; O'Grady *et al.*, 2006; Steppe *et al.*, 2010; Vandegehuchte and  
42 Steppe, 2013; Uddin and Smith, 2014). International studies indicate that at the plant scale, introduced  
43 invasive species can use from 100 % less water to between 150 to 300 % more water than indigenous  
44 landscapes. Furthermore, there can be a significant disconnect between up-scaling plant scale  
45 measurements to an ecosystem scale (Cavaleri and Sack, 2010). In South Africa, the HPV technique  
46 has been shown to provide accurate estimates of sap flow in both introduced tree species such as *A.*  
47 *mearnsii* and *Eucalyptus grandis*, and indigenous tree species such as *Podocarpus henkelii* and *C.*  
48 *africana* (Smith and Allen, 1996; Dye *et al.*, 2001; Everson *et al.*, 2007; Dye *et al.*, 2008). A key



1 recommendation from the literature, which has been emphasized in a recent study by Gush and Dye  
2 (2015), is that more indigenous tree stand management research is needed in South Africa.

3  
4 Spatial estimates of evaporation and transpiration are required but are difficult to obtain in remote areas  
5 with limited aerodynamic fetch. A large capital and human effort was invested towards this study in  
6 order to extend the monitoring period, with a range of species and replicates. This allowed for an  
7 accurate comparison of indigenous and introduced tree water-use. The Buffeljags River site is unique in  
8 that it is one of very few sites within South Africa with an extensive rehabilitation programme that aims  
9 to assist WfW and similar clearing programmes. The results showed that individual tree water-use varies  
10 depending on size and species. Up-scaled comparisons showed that stem density is important to the  
11 accurate representation of stand water-use. A stand of introduced *A. mearnsii* can use up to six times  
12 more water annually than a mixed indigenous stand. This finding is significant in that it provides clear  
13 evidence to justify the highly expensive clearing programmes, which have in the past lacked quantifiable  
14 data on the potential hydrological benefits of alien plant clearing. The results also indicate that  
15 rehabilitation or clearing programmes need to consider the seasonal rainfall variability of a site as  
16 planting of deciduous indigenous trees may provide larger benefits in summer rainfall areas due to no  
17 transpiration during periods when water resources are limited.

18  
19 This study provides an ideal opportunity to validate remotely sensed ET data which could also be used  
20 to identify spatial variations in vegetation water-use. This future research will allow for the broader  
21 extrapolation of alien plant water-use and benefits of clearing riparian zones to similar areas outside of  
22 the immediate study area. Results may be used to further validate transpiration simulations from  
23 hydrological models, particularly in riparian areas.

24  
25  
26  
27  
28  
29 *Acknowledgements.* The research presented in this paper forms part of an unsolicited research project  
30 (Rehabilitation of alien invaded riparian zones and catchments using indigenous trees: an assessment  
31 of indigenous tree water-use) that was initiated by the Water Research Commission (WRC) of South  
32 Africa. The project was managed and funded by the WRC, with co-funding and support provided by  
33 the Department of Economic Development, Tourism and Environmental Affairs (EDTEA). The land  
34 owners, Brian and Janet Kilpen of Frog Mountain Inn, are acknowledged for allowing field work to be  
35 conducted on their property. Assistance in the field by Dr Terry Everson, Matthew Becker and Liandra  
36 Scott-Shaw is much appreciated.

## 5 References

- Askey-Dorin, M., Petit, N., Robins, L., and McDonald, D.: The role of vegetation in riparian management. In: Riparian Land Management Technical Guidelines. Vol. 1. Principles of Sound Management. Eds. S. Lovett and P. Price. LWRRDC Canberra. pp. 97-120, 1999.
- Atsame-Edda, A.: Regeneration dynamics of natural forest species within a stand of the invasive alien *Acacia mearnsii* along the Buffeljagsrivier, Swellendam, South Africa. MSc Thesis. Stellenbosch University, 2014.
- Baruch, Z., and Fernandez, D.S.: Water relations of native and introduced C4 grasses in a neotropical savanna. *Oecologia* 96:179–185, 1993.
- Burgess, S. O., Adams, M. A., Turner, N. C., Beverly, C. R., Ong, C. K., Khan, A. A. H., and Bleby, T. M.: An improved heat pulse method to measure low and reverse rates of sap flow in woody plants, *Tree Physiol.*, 21, 589-598, 2001.
- Cavaleri, M.A., and Sack, L.: Comparative water use of native and invasive plants at multiple scales: a global meta-analysis. *Ecology*, 91(9), 2010, pp. 2705–2715, 2010.
- Cleverly, J. R., Smith, S. D., Sala, A., and Devitt, D.A.: Invasive capacity of *Tamarix ramosissima* in a Mojave Desert floodplain: the role of drought. *Oecologia* 111:12–18, 1997.
- Clulow, A.D., Everson, C.S., Price, J.S., Jewitt, G.P.W., and Scott-Shaw, B.C.: Water-use dynamics of a peat swamp forest and dune forest in Maputaland, South Africa, *Hydrol. Earth Syst. Sci.*, 17, 2053-2067, 2013.
- Cullis, J., Görgens, A., and Marais, C.: A strategic study of the impact of invasive alien vegetation in the mountain catchment areas and riparian zones of South Africa on total surface water yield. *Water SA* 33 (1) 35-42, 2007.
- Dixon, P., Hilton, M., and Bannister, P.: *Desmoschoenus spiralis* displacement by *Ammophila arenaria*: the role of drought. *New Zealand Journal of Ecology* 28:207–213, 2004.
- Dye, P. J.: Modelling growth and water-use in four *Pinus patula* stands with the 3-PG process-based model, *Southern African Forestry Journal*, No. 191(53-63), 2001.
- Dye, P. J., Gush, M. B., Everson, C. S., Jarman, C., Clulow, A., Mengistu, M., Geldenhuys, C. J., Wise, R., Scholes, R. J., Archibald, S., and Savage, M. J.: Water-use in relation to biomass of indigenous tree species in woodland, forest and/or plantation conditions, Water Research Commission Report No. 361/08, ISBN 978-1-77005-744-9, Water Research Commission, Pretoria, South Africa, 156 pp., 2008.
- Everson, C. S., Gush, M. B., Moodley, M., Jarman, C., Govender, M., and Dye, P.: Effective management of the riparian zone vegetation to significantly reduce the cost of catchment management and enable greater productivity of land resources, Water Research Commission Report No. 1284/1/07, ISBN 978-1-77005-613-8, Pretoria, South Africa, 92 pp., 2007.
- Ford, C.R., McGuire, M.A., Mitchell, R.J. and Teskey, R.O.: Assessing variation in the radial profile of sap flux density in *Pinus* species and its effect on daily water-use. *Tree Physiol.* 24, 241-249, 2004.
- Fritzsche, F., Abate, A., Fetene, M., Beck, E., Weise, S., and Guggenberger, G.: Soil-plant hydrology of indigenous and exotic trees in an Ethiopian montane forest. *Tree Physiology* 26:1043–1054, 2006.

1 Geldenhuys, C. J.: National forest types of South Africa: SA Forestry Magazine, Department of  
2 Agriculture, Forestry and Fisheries, Pretoria, South Africa, 2010.  
3  
4 Granier, A., Loustau, D. and Bréda, N.: A Generic Model of Forest Canopy Conductance Dependent  
5 on Climate, Soil Water Availability and Leaf Area Index. *Annals of Forest Science*. 57, 755-765, 2001.  
6  
7 Gush, M. B. and Dye, P. J.: Water-use Measurements of Selected Woodland Tree Species within the  
8 Kruger National Park. CSIR, % Agrometeorology, School of Environmental Sciences, University of  
9 KwaZulu-Natal, Scottsville, South Africa, 2008.  
10  
11 Gush, M. B. and Dye, P. J.: Water-Use Efficiency Within a Selection of Indigenous and Exotic Tree  
12 Species in South Africa as Determined Using Sap Flow and Biomass Measurements. CSIR, %  
13 Agrometeorology, School of Environmental Sciences, University of KwaZulu-Natal, Scottsville, South  
14 Africa, 2009.  
15  
16 Gush, M. B.: Water-use, growth and water-use efficiency of indigenous tree species in a range of forest  
17 and woodland systems in South Africa. PhD dissertation, Department of Botany, University of Cape  
18 Town, 2011.  
19  
20 Gush, M. B., de Lange, W.J., Dye, P.J. and Geldenhuys, C.J.: Water-use and Socio-Economic  
21 Benefit of the Biomass of Indigenous Trees Volume 1: Research Report, 2015.  
22  
23 Jarmain, C., Everson, C.S., Savage, M.J., Clulow, A.D., Walker, S. and Gush, M.B.: Refining tools for  
24 evaporation monitoring in support of water resource management. Water Research Commission Report  
25 No. 1567/1/08. Water Research Commission, Pretoria, RSA, 2008.  
26  
27 Jewitt, G.: Integrating blue and green water flows for water resources management and planning,  
28 *Physics and Chemistry of the Earth, Parts A/B/C* 31(15–16), 753-762, 2006.  
29  
30 Joshi, C., de Leeuw, J., and van Duren, I.C.: Remote sensing and GIS applications for mapping and  
31 spatial modelling of invasive species. Pages 669-677. ISPRS, Istanbul, Turkey, 2004.  
32  
33 Kagawa, A., Sack, L., Duarte, K. and James, S.A.: Hawaiian native forest conserves water relative to  
34 timber plantation: Species and stand traits influence water-use. *Ecological Applications* 19:1429–1443,  
35 2009.  
36  
37 Le Maitre, D.C., van Wilgen, B.W., Chapman, R.A., and McKelly, D.H.: Invasive plants and water  
38 resources in the Western Cape Province, South Africa: modelling the consequences of a lack of  
39 management. *Journal of Applied Ecology* 33, 161–172, 1996.  
40  
41 Marshall, D. C.: Measurement of sap flow in conifers by heat transport. *Plant Physiology*, 33, 385-396,  
42 1958.  
43  
44 Miller, G.R., Xingyuan, C., Yoram, R., and Baldocchi, D.D.: A new technique for upscaling sap flow  
45 transpiration measurements to stand or land use scale fluxes. Civil and Environmental Engineering,  
46 University of California – Berkeley, 2007.  
47  
48 Mucina, L., and Rutherford, M.C.: The vegetation of South Africa, Lesotho and Swaziland. *Strelitzia*  
49 19. South African National Biodiversity Institute, Pretoria, 2011.  
50  
51 Nagler, P. L., Glenn, E.P. and Thompson, T.L.: Comparison of transpiration rates among saltcedar,  
52 cottonwood and willow trees by sap flow and canopy temperature methods. *Agricultural and Forest*  
53 *Meteorology* 116:73–89, 2003.  
54

1 Nosetto, M. D., Jobbagy, E.G. and Paruelo, J.M.: Landuse change and water losses: the case of  
2 grassland afforestation across a soil textural gradient in central Argentina. *Global Change Biology*  
3 11:1101–1117, 2005.  
4  
5 O'Grady, A.P., Cook, P.G., Howe, P. and Werren, G.: An assessment of groundwater-use by dominant  
6 tree species in remnant vegetation communities, Pioneer Valley, Queensland. *Aust. J. Bot.* 2006.  
7  
8 Olbrich, B., Olbrich, K., Dye, P.J. and Soko, S. A.: Year-Long Comparison of Water-use Efficiency of  
9 Stressed and Non- Stressed *E. grandis* and *P. patula*: Findings and Management Recommendations.  
10 CSIR report FOR-DEA 958. CSIR, Pretoria, South Africa, 1996.  
11  
12 Pratt, R. B., and Black, R.A.: Do invasive trees have a hydraulic advantage over native trees? *Biological*  
13 *Invasions* 8: 1331–1341, 2006.  
14  
15 Reid, A.M.L., Morin, P.O., Downey, K., French, K.O., and Virtue, J.G.: Does invasive plant  
16 management aid the restoration of natural ecosystems? *Biological Conservation* 142:2342-2349, 2009.  
17  
18 Richardson, D.M., Rouget, M., Ralston, S.J., Cowling, R.M., VAN Rensburg, B.J., and Thuiller, W.:  
19 Species richness of alien plants in South Africa: Environmental correlates and the relationship with  
20 indigenous plant species richness. *Ecoscience*. 12, 391-402, 2005.  
21  
22 Scott, D.F.: Managing riparian zone vegetation to sustain streamflow: Results of paired catchment  
23 experiments in South Africa. *Canadian Journal of Forest Research*, 1999.  
24  
25 Scott, D.F., and Lesch, W.: The effects of riparian clearing and clearfelling of an indigenous forest on  
26 streamflow, stormflow and water quality. *S. Afr. For. J.* 175: 1-14, 1996.  
27  
28 Smith, D., and Allen, S.: Measurement of sap flow in plant stems. *Journal of Experimental Botany*,  
29 47(12), 1833. <http://dx.doi.org/10.1093/jxb/47.12.1833>, 1996.  
30  
31 Solarz, W.: Biological invasions as a threat for nature. *Progress in Plant Protection* 47:128-133, 2007.  
32  
33 Steppe, K., De Pauw, D.J.W., Doody, T.M., Teskey, R.O.: A comparison of sap flux density using  
34 thermal dissipation, heat pulse velocity and heat field deformation methods. Laboratory of Plant  
35 Ecology, Department of Applied Ecology and Environmental Biology, Faculty of Bioscience  
36 Engineering, Ghent University, Coupure links 653, 9000 Gent, Belgium, 2010.  
37  
38 Savage M.J., Everson, C.S., Odhiambo, G.O., Mengistu, M.G. and Jarman, C.: Theory and practice of  
39 evaporation measurement, with a special focus on SLS as an operational tool for the estimation of  
40 spatially-averaged evaporation, Water Research Commission Report No. 1335/1/04. Water Research  
41 Commission, Pretoria, RSA, 2004.  
42  
43 Swanson, R. H., and Whitfield, D. W. A.: A Numerical Analysis of Heat Pulse Velocity Theory and  
44 Practice, *J. Exp. Bot.*, 32, 221-239, 1981.  
45  
46 Tabacchi, E., Lambs, L., Guillo, G., Planty-Tabacchi, A.M., Muller, E., and de'Camps, H.: Impacts of  
47 riparian vegetation on hydrological processes. *Hydrological Processes*. 14, 2959–2976, 2000.  
48  
49 Turpie, J.K, Marais, C. and Blignaut, J.N.: The working for water programme: Evolution of a payments  
50 for ecosystem services mechanism that addresses both poverty and ecosystem service delivery in South  
51 Africa. *Ecol. Econ.* 65 (4) 788-798, 2008.  
52  
53 Vandegheuchte, M.W. and Steppe, K.: Sap-flux density measurement methods: working principles and  
54 applicability. Laboratory of Plant Ecology, Faculty of Bioscience Engineering, Ghent University,  
55 Coupure links 653, 9000 Gent, Belgium, 2013.

1  
2  
3  
4  
5  
6  
7  
8  
9  
10  
11  
12  
13

Van Wilgen, B.W., Davies, S.J. and Richardson, D.M.: Invasion science for society: A decade of contributions from the Centre for Invasion Biology. *S Afr J Sci.*;110(7/8), Art. #a0074, 12 pages, 2014.

Wal, R.V.D., Truscott, A.M., Pearce, I.S.K., Cole, L., Harris, M.P., and Wanless, S.: Multiple anthropogenic changes cause biodiversity loss through plant invasion. *Global Change Biology* 14:1428-1436, 2008.

Yepez, E. A., Huxman, T.E., Ignace, D.D., English, N.B., Weltzin, J.F., Castellanos, A.E. and Williams, D.G.: Dynamics of transpiration and evaporation following a moisture pulse in semiarid grassland: a chamber-based isotope method for partitioning flux components. *Agricultural and Forest Meteorology* 132:359–376, 2005.

1 Table 1. Tree physiology and specific data required for the calculation of sap flow and up-scaling.

| Indigenous Forest site (upper reach)       | Wood density (m <sup>3</sup> kg <sup>-1</sup> ) | Moisture fraction | Average wounding (mm) | Diameter (mm) | Size Class (S/M/L) | Representative Stem Density (stems·ha <sup>-1</sup> ) |
|--------------------------------------------|-------------------------------------------------|-------------------|-----------------------|---------------|--------------------|-------------------------------------------------------|
| <i>Rothmania capensis</i>                  | 0.59                                            | 0.45              | 2.8                   | 125           | S                  | 120                                                   |
| <i>V. lanceolata</i>                       | 0.63                                            | 0.42              | 3.7                   | 134           | M                  | 65                                                    |
| <i>V. lanceolata</i>                       | 0.66                                            | 0.42              | 3.4                   | 199           | L                  | 24                                                    |
| Introduced/Alien Forest site (lower reach) |                                                 |                   |                       |               |                    |                                                       |
| <i>Acacia mearnsii</i>                     | 0.54                                            | 0.89              | 3.2                   | 121           | S                  | 650                                                   |
| <i>Acacia mearnsii</i>                     | 0.73                                            | 0.47              | 3.2                   | 167           | M                  | 200                                                   |
| <i>Acacia mearnsii</i>                     | 0.61                                            | 0.71              | 3.0                   | 194           | L                  | 50                                                    |
| Indigenous Cluster (lower reach)           |                                                 |                   |                       |               |                    |                                                       |
| <i>V. lanceolata</i>                       | 0.66                                            | 0.45              | 3.2                   | 166           | M                  | 65                                                    |
| <i>V. lanceolata</i>                       | 0.65                                            | 0.45              | 3.2                   | 174           | M                  | 65                                                    |
| <i>V. lanceolata</i>                       | 0.66                                            | 0.47              | 2.9                   | 202           | L                  | 24                                                    |
| Indigenous Cluster (lower reach)           |                                                 |                   |                       |               |                    |                                                       |
| <i>C. africana</i>                         | 0.71                                            | 0.52              | 6.1                   | 319           | L                  | 24                                                    |
| <i>C. africana</i>                         | 0.71                                            | 0.50              | 6.0                   | 422           | L                  | 24                                                    |

2 \*Note: The stem density was grouped as per size class

3

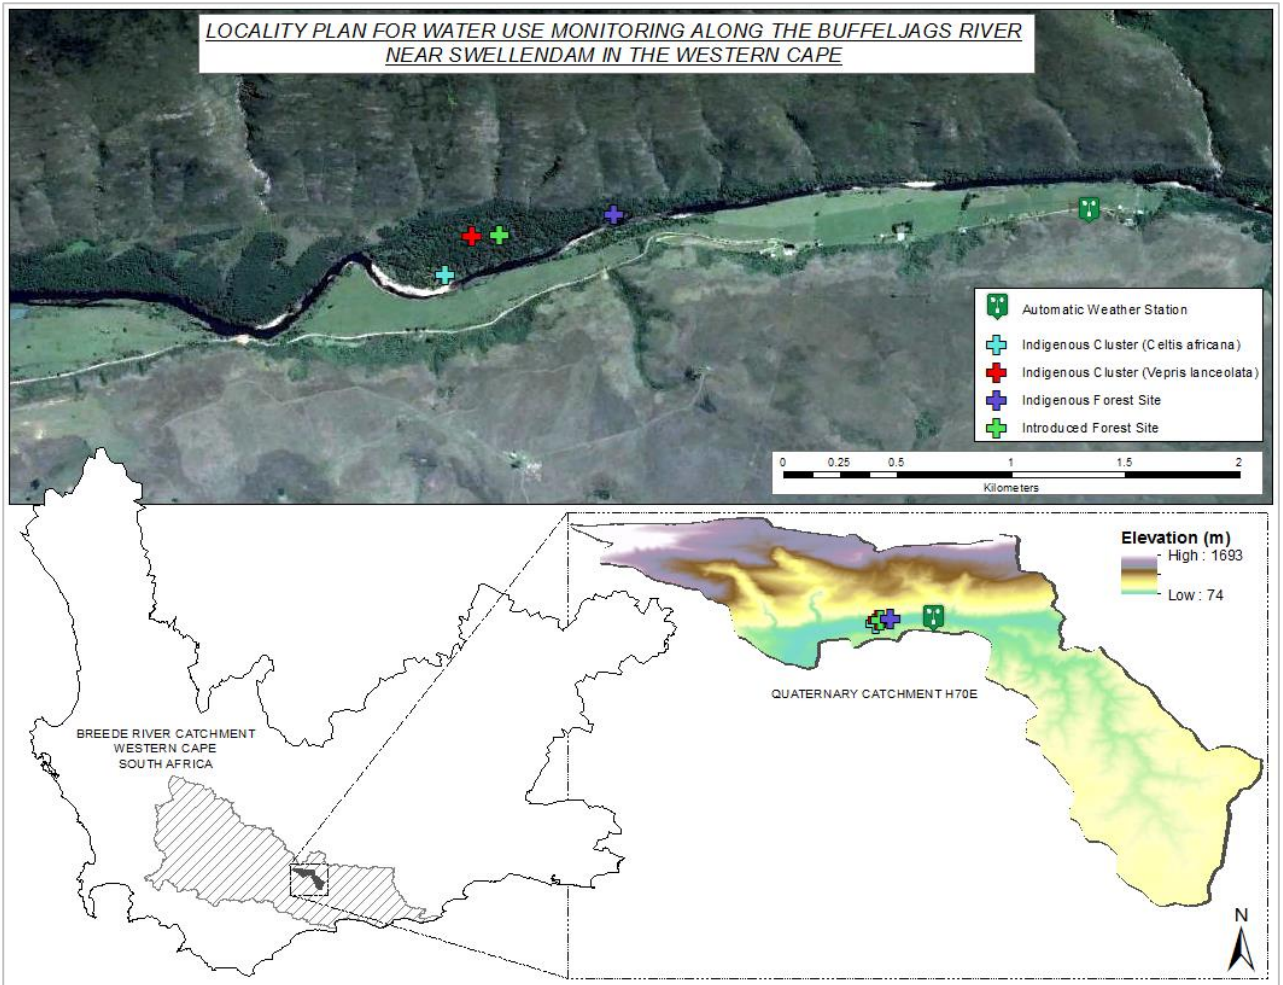

1  
 2 Figure 1. Location of the Buffeljags River research area within the Western Cape, South Africa  
 3

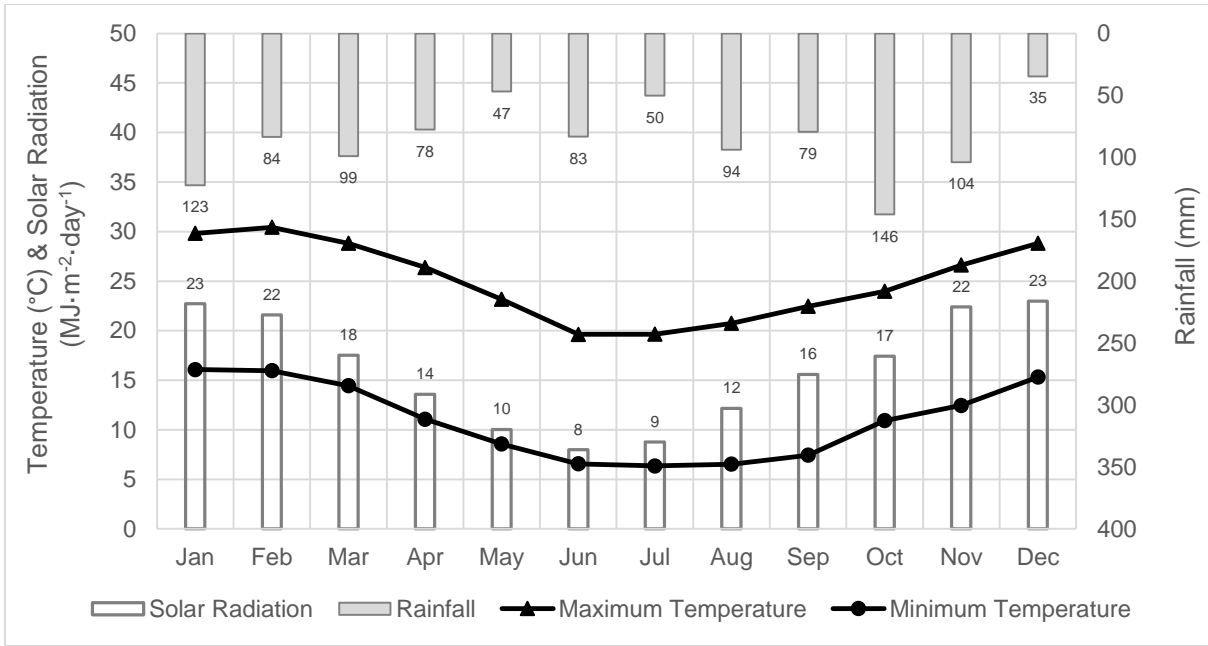

1  
2 Figure 2. The monthly rainfall, monthly solar radiant density, and average monthly maximum  
3 and minimum air temperatures at Buffeljags River averaged over three years.  
4

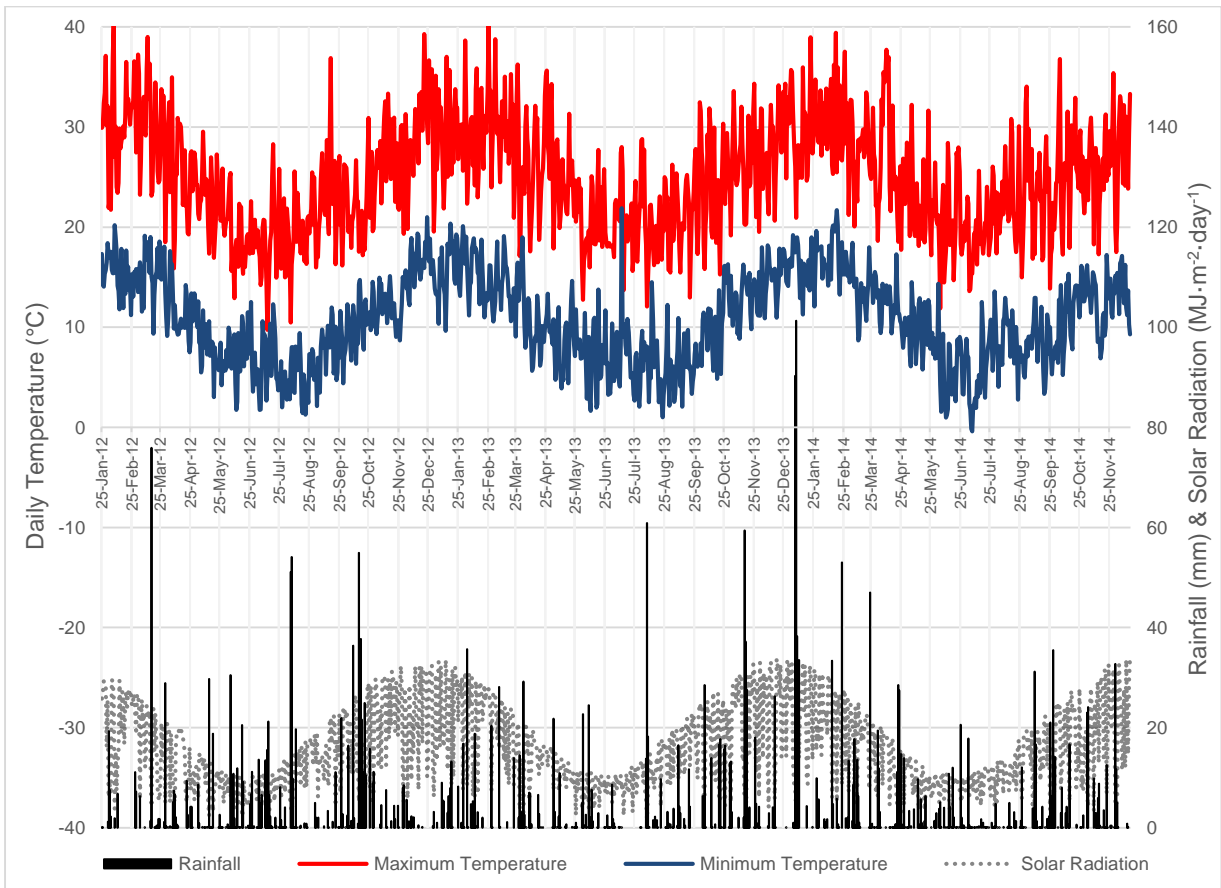

5  
6 Figure 3. The daily rainfall, solar radiation and maximum and minimum air temperatures at  
7 Buffeljags River .  
8



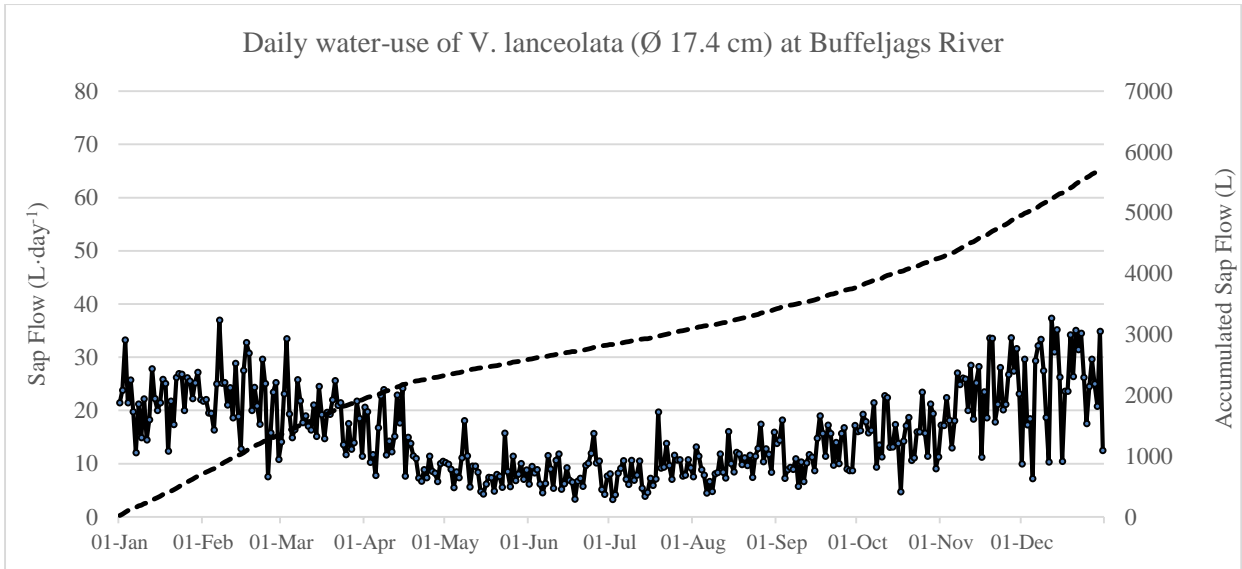

1

2

3

4

Figure 4. Sap flow (daily and accumulated) from a *V. lanceolata* in the lower reach stand at Buffeljags River (January 2012 to March 2015) averaged over three years

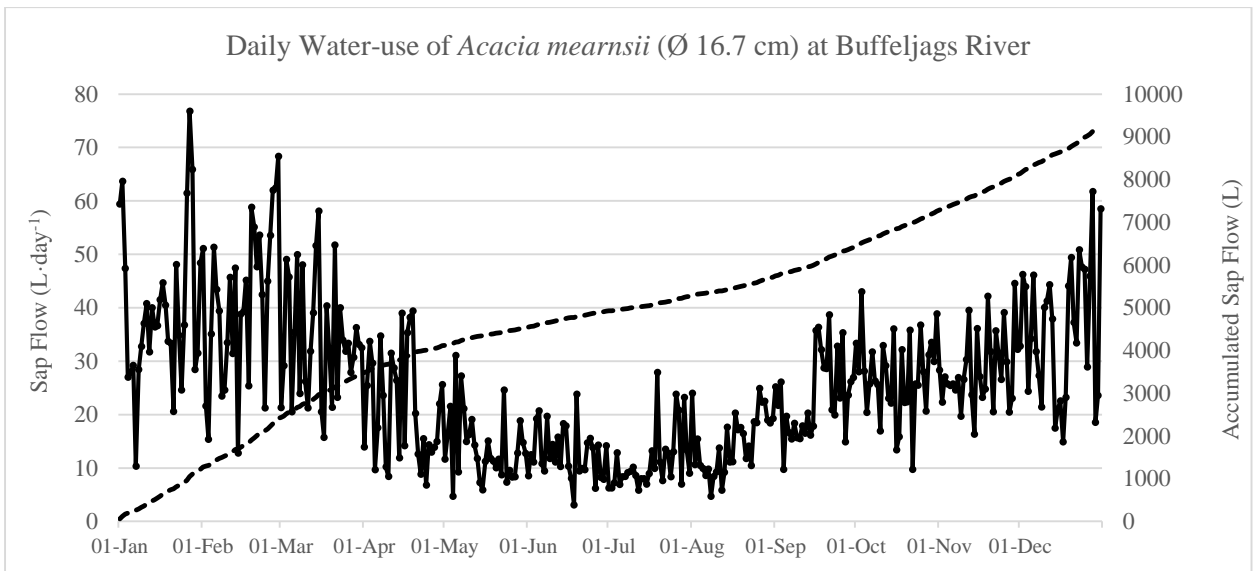

5

6

7

8

9

Figure 5. Sap flow (daily and accumulated) from an *Acacia mearnsii* in the lower reach stand at Buffeljags River (January 2012 to March 2015) averaged over three years

1  
2

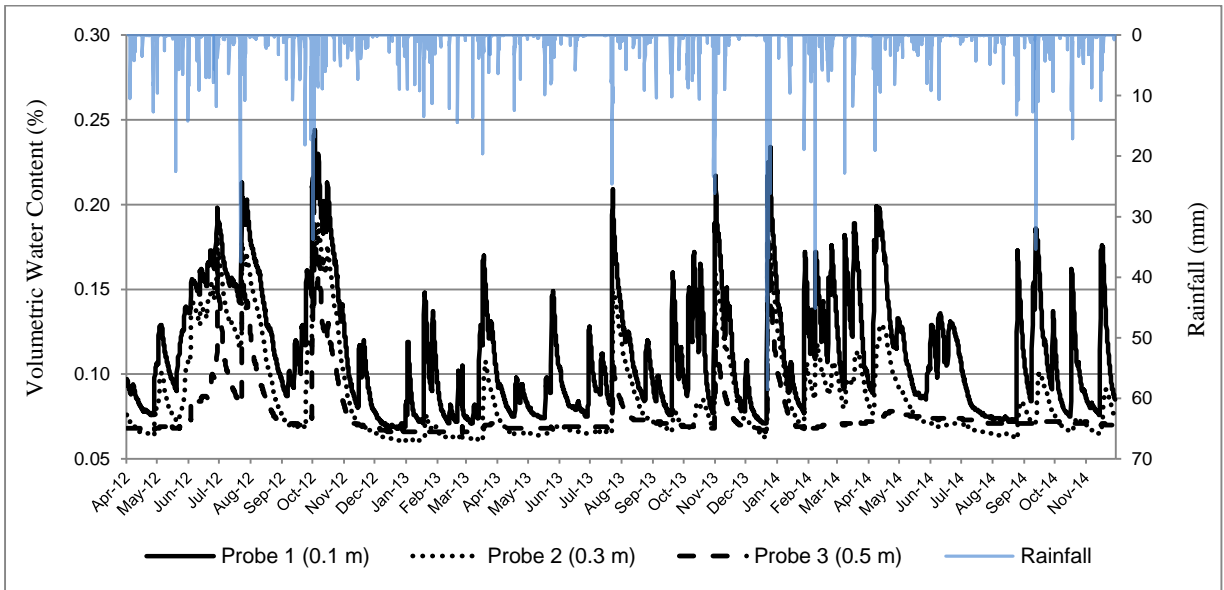

3  
4  
5  
6

Figure 6. Hourly volumetric water content of the lower alien stand corresponding to the hourly rainfall at Buffeljags River

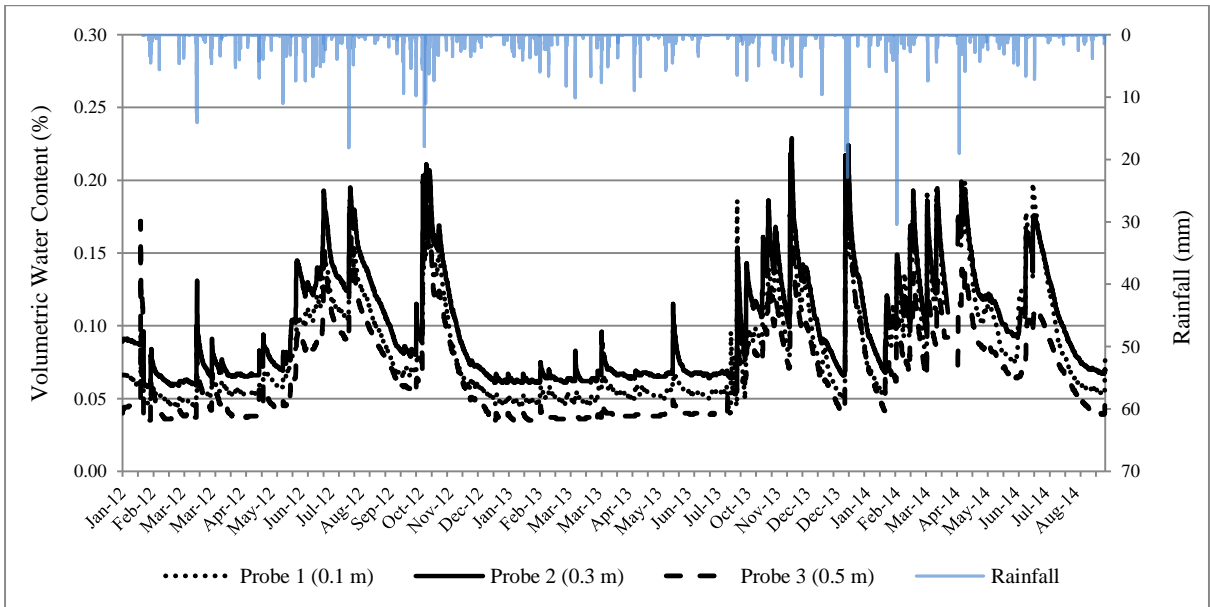

7  
8  
9  
10  
11

Figure 7. Hourly volumetric water content of the upper indigenous stand corresponding to the hourly rainfall at Buffeljags River

1 Table 2. Sap flow (daily and accumulated) for each species measured at Buffeljags River (January  
 2 2012 to March 2015)

| Forest Type / Location                     | Species                   | Daily Average Summer Sap Flow (L) | Daily Average Winter Sap Flow (L) | Annual Accumulated Sap Flow (L) |
|--------------------------------------------|---------------------------|-----------------------------------|-----------------------------------|---------------------------------|
| Indigenous Forest site (upper reach)       | <i>V. lanceolata</i>      | 19                                | 7                                 | 6 534                           |
|                                            | <i>V. lanceolata</i>      | 37                                | 6                                 | 15 565                          |
|                                            | <i>Rothmania capensis</i> | 11                                | 4                                 | 4 133                           |
| Introduced/Alien Forest site (lower reach) | <i>Acacia mearnsii</i>    | 25                                | 8                                 | 9 226                           |
|                                            | <i>Acacia mearnsii</i>    | 39                                | 10                                | 5 469                           |
|                                            | <i>Acacia mearnsii</i>    | 32                                | 9                                 | 7 207                           |
| Indigenous Cluster (lower reach)           | <i>V. lanceolata</i>      | 14                                | 6                                 | 5 725                           |
|                                            | <i>V. lanceolata</i>      | 24                                | 8                                 | 3 430                           |
|                                            | <i>V. lanceolata</i>      | 39                                | 14                                | 9 174                           |
| Indigenous Cluster (lower reach)           | <i>C. africana</i>        | 46                                | 0                                 | 19 821                          |
|                                            | <i>C. africana</i>        | 95                                | 0                                 | 37 769                          |

3

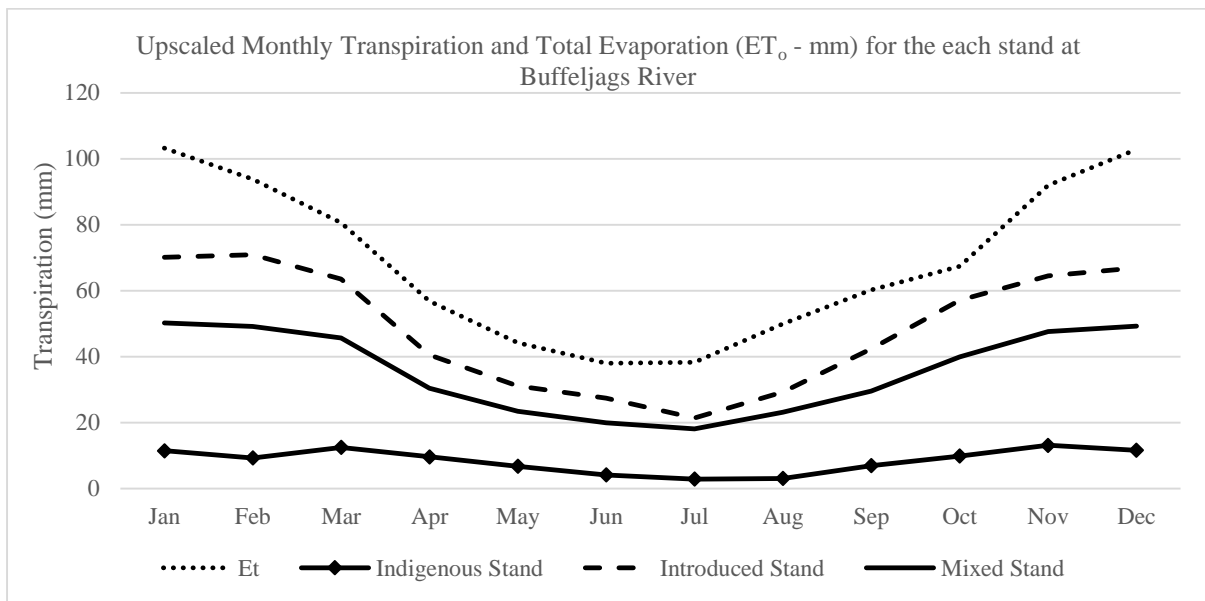

4

5 Figure 8. Upscaled monthly transpiration for the indigenous, introduced (*A. mearnsii*) and mixed  
 6 stands in comparison to reference total evaporation  
 7
